# Supplementary material
Source: PubMed Central journal article supplement (PMC2675563)
Supplement: supp_179_9_765__1.pdf [file supp_179_9_765__1.pdf]

## **Serum Vitamin D Levels and Severity of Childhood Asthma in Costa Rica**

\*<sup>1,2,4</sup>John M. Brehm.\*<sup>1-4</sup>Juan C. Celedón,<sup>5</sup>Manuel E. Soto-Quiros,<sup>5</sup>Lydiana Avila,  
<sup>1,2,4</sup>Gary M. Hunninghake,<sup>1,4,6</sup>Erick Forno,<sup>1</sup>Daniel Laskey,<sup>1</sup>Jody S. Sylvia,<sup>7</sup>Bruce W.  
Hollis<sup>1,4</sup>Scott T. Weiss,<sup>1-4</sup>Augusto A. Litonjua

### **Online Supplement**

## **Methods**

### ***Study Population***

Children included in the study were index cases for a family-based genetic study of asthma in Costa Rica. Subject recruitment and study procedures have been described in detail elsewhere (1, 2). From February of 2001 to December of 2006, short questionnaires were sent to the parents of 13,125 children ages 6 to 14 years who were enrolled in 113 schools in Costa Rica. Of the 7,282 children whose parents returned screening questionnaires, 2,714 had asthma (defined as physician-diagnosed asthma and either at least two respiratory symptoms or asthma attacks in the previous year). Of these 2,714 children, 616 (22.7%) unrelated children had high probability of having at least 6 great-grandparents born in the Central Valley of Costa Rica and were willing to participate in our study. The former criterion was required to increase the likelihood that children would be descendants of the founder population of the Central Valley (3). There was no significant difference in sex or grade in school between children who did and did not agree to participate in the study.

Written consent was obtained from the parents of participating children, from whom assent was also obtained if  $\geq 8$  years old. The study was approved by the Institutional Review Boards of the Hospital Nacional de Niños (San José, Costa Rica) and Brigham and Women's Hospital (Boston, MA).

### **PROCEDURES**

Study participants completed a protocol that included a questionnaire, spirometry, allergy skin testing, measurement of serum total and allergen-specific IgE, peripheral blood eosinophil count, 25-hydroxyvitamin D, and (on a separate visit) assessment of

airway responsiveness to methacholine. In addition, a stool specimen was examined for ova and parasites in the first 137 study participants (because helminths were not found in any instance, stool samples were not collected for the remaining study subjects).

### ***Questionnaires***

Parents of each participating child completed slightly modified versions of questionnaires used in the Collaborative Study on the Genetics of Asthma (4) and the International Study of Asthma and Allergies in Childhood (ISAAC) (5). These questionnaires were used to obtain information of demographics, participants' general and respiratory health, healthcare utilization, and various environmental exposures.

### ***Pulmonary Function Testing***

Spirometry was conducted following American Thoracic Society recommendations (6) using a Survey Tach Spirometer (Warren E. Collins, Braintree, MA). Subjects were instructed to avoid use of short-acting bronchodilators for at least four hours before testing. Spirometric maneuvers were performed with subjects seated and wearing a noseclip. The best FEV<sub>1</sub> and FVC were selected for data analysis of FEV<sub>1</sub> and FEV<sub>1</sub>/FVC. After completing baseline spirometry, subjects were given 200 µg (2 puffs) of an albuterol metered-dose inhaler using a spacer, and spirometry was repeated after 15 minutes.

### ***Methacholine challenge testing***

After completion of baseline spirometry, subjects whose FEV<sub>1</sub> was at least 65% of predicted underwent methacholine challenge testing using a slightly modified version of the Chatham protocol (7). The study protocol consisted of five breaths of saline solution followed by one breath of a 1 mg/ml methacholine solution, one and four breaths of a 5

mg/ml methacholine solution, and one breath of a 25 mg/ml methacholine solution. All inhalations, which were taken from a DeVilbiss 646 nebulizer (Sunrise Medical, Carlsbad, CA), lasted 6 seconds and were followed by 2 seconds of breath holding. After each inhalation level, spirometry was performed at 180, 210, and 240 seconds. The test was terminated if the FEV<sub>1</sub> declined by at least 20% from the best FEV<sub>1</sub> value after inhalation of saline solution.

### ***Serum Total and Allergen-specific IgE, and Peripheral Blood Eosinophil Count***

Serum total and allergen-specific IgE levels were determined by the UniCAP 250 system (Pharmacia & Upjohn, Kalamazoo, MI), with samples measured in duplicate. Total serum IgE levels were transformed to a log<sub>10</sub> scale for data analysis. Serum was assayed for IgE to each of three allergens: cockroach (*Blatella germanica* [Bla g 1]); dust mite (*Dermatophagoides pteronyssinus* [Der p 1]); and *Ascaris lumbricoides*. Peripheral blood eosinophil count was measured by Coulter-counter techniques and then transformed to a log<sub>10</sub> scale for data analysis.

### ***Allergy Skin Testing***

Skin testing was performed according to the ISAAC protocol. In addition to histamine and saline controls, the following antigens were applied to the volar surface of the forearm: *Dermatophagoides pteronyssinus*, *Dermatophagoides farinae*, *Blatella germanica*, *Periplaneta americana*, cat dander, dog dander, mixed grass pollen, mixed tree pollen, and *Alternaria tenuis*. A test was considered positive if the maximum diameter of the wheal was 3 mm after subtraction of the maximum diameter of the negative control.

### ***Serum 25-Hydroxyvitamin D<sub>3</sub> (25(OH)D)***

Serum levels of 25-hydroxyvitamin D (hereafter referred to as vitamin D) are considered as the best circulating biomarker of vitamin D metabolic status and reflect contributions from all sources of vitamin D (i.e. diet and sun exposure) (8, 9). A single measurement of serum vitamin D was performed on all subjects using a radioimmunoassay method in Dr. Bruce Hollis' laboratory at the University of South Carolina (10, 11). Vitamin D levels were transformed to a  $\log_{10}$  scale for data analysis. In descriptive analyses, we also categorized vitamin D levels into deficient ( $<20$  ng/ml), insufficient ( $\geq 20$  and  $<30$  ng/ml), and sufficient ( $\geq 30$  ng/ml) based on previous recommendations (12-14).

#### ***Measurement of Der p Allergen in House Dust Samples***

Dust samples were collected with a vacuum clear (model 6735; Douglas Quikut; Walnut Ridge, AR) from the following five areas of the child's household: the upper mattress surface of the child's bed; an upholstered chair or sofa in the family room or the living room; and floor samples from the child's bedroom, the family room or living room, and the kitchen. *Der p* was measured in the composite dust sample collected from the five areas of the home by monoclonal antibody enzyme-linked immunosorbent assays (15).

#### ***Statistical Analysis***

The following variables were examined as possible confounders of the relationship between vitamin D levels and the outcomes of interest: age, gender, serum total and allergen-specific IgE, eosinophil count, FEV<sub>1</sub>, FEV<sub>1</sub>/FVC, absolute bronchodilator response (ml), parental report of mold/mildew in the home, use of anti-inflammatory medications in the previous year, parental history of asthma, parental

history of eczema, parental history of hay fever, and *Der p* allergen levels. BMI was considered as a gender-specific z-score (calculated based on the US CDC 2000 growth charts) (16).

A descriptive analysis of univariate predictors was performed using quartiles of vitamin D. P values were calculated using the Cochran-Armitage test for trend for binary predictors, and linear regression for continuous variables. We examined the relation between  $\log_{10}$  vitamin D and the following continuous outcomes using linear regression: total IgE, eosinophil count, log-transformed dose-response slope to methacholine, baseline FEV<sub>1</sub>, and bronchodilator responsiveness (ml). We examined the relation between  $\log_{10}$  vitamin D and the following binary outcomes using logistic regression: use of anti-inflammatory medications (inhaled corticosteroids or leukotriene inhibitors) in the previous year, any hospitalization within the past year, any visit to urgent care or the emergency department within the past year, and PD<sub>20</sub>  $\leq$  8.58  $\mu$ mol of methacholine. Finally, we used a generalized linear model with a negative binomial distribution and a log link function to examine the number (count) of hospitalizations over the past year. Negative binomial regression is similar to Poisson regression for analyzing discrete count data. Negative binomial regression requires fewer assumptions than Poisson regression, and generally results in more conservative P values (17). Negative binomial regression also performs better than Poisson regression when the data are overdispersed, as is the case in this dataset.

A stepwise approach was used to build all multivariate models. All of the final models included vitamin D level, age, gender, BMI z-score, and parental education (as a surrogate for socioeconomic status). Other variables also remained in the final models if

they were significant at  $P < 0.05$  or if they satisfied a change in estimate criterion ( $\geq 10\%$ ) in the parameter estimate (e.g., odds ratio). All analyses were performed using SAS version 9.1 and JMP 7 (both from SAS Institute, Cary, NC).

## RESULTS

### *Predictors of Vitamin D levels*

In bivariate analyses of potential predictors of vitamin D levels, only age was statistically significant ( $\beta -0.007$ ,  $p = .009$ ), while male gender was nearly significant ( $\beta .02$ ,  $p = .05$ ). BMI z-score and parental education (as a surrogate for socioeconomic status) were not significantly associated with vitamin D levels. However, BMI and socioeconomic status have been previously associated with both asthma and vitamin D levels (18-21), and thus they were included in all multivariate models.

## REFERENCES

1. Hunninghake GM, Soto-Quiros ME, Avila L, Ly NP, Liang C, Sylvia JS, Klanderman BJ, Silverman EK, Celedon JC. Sensitization to *Ascaris lumbricoides* and severity of childhood asthma in Costa Rica. *J Allergy Clin Immunol* 2007;119:654-661.
2. Ly NP, Soto-Quiros ME, Avila L, Hunninghake GM, Raby BA, Laskey D, Sylvia JS, Celedon JC. Paternal asthma, mold exposure, and increased airway responsiveness among children with asthma in Costa Rica. *Chest* 2008;133:107-114.

3. Escamilla MA, Spensy M, Reus VI, Gallegos A, Meza L, Molina J, Sandkuijl LA, Fournier E, Leon PE, Smith LB, et al. Use of linkage disequilibrium approaches to map genes for bipolar disorder in the Costa Rican population. *Am J Med Genet* 1996;67:244-253.
4. Blumenthal MN, Banks-Schlegel S, Bleecker ER, Marsh DG, Ober C. Collaborative studies on the genetics of asthma--National Heart, Lung and Blood Institute. *Clin Exp Allergy* 1995;25 Suppl 2:29-32.
5. ISAAC. Phase II modules of the International Study of Asthma and Allergies in Childhood. June 14th, 2004 January 15th, 2008]. Available from: <http://www.uni-ulm.de/epidemiologie/ISAACII/>.
6. Standardization of Spirometry, 1994 Update. American Thoracic Society. *Am J Respir Crit Care Med* 1995;152:1107-1136.
7. Chatham M, Bleecker ER, Smith PL, Rosenthal RR, Mason P, Norman PS. A comparison of histamine, methacholine, and exercise airway reactivity in normal and asthmatic subjects. *Am Rev Respir Dis* 1982;126:235-240.
8. Hollis BW. Circulating 25-hydroxyvitamin D levels indicative of vitamin D sufficiency: implications for establishing a new effective dietary intake recommendation for vitamin D. *J Nutr* 2005;135:317-322.
9. Hollis BW, Wagner CL. Normal serum vitamin D levels. *N Engl J Med* 2005;352:515-516; author reply 515-516.
10. Hollis BW, Kamerud JQ, Selvaag SR, Lorenz JD, Napoli JL. Determination of vitamin D status by radioimmunoassay with an <sup>125</sup>I-labeled tracer. *Clin Chem* 1993;39:529-533.



11. Hollis BW, Napoli JL. Improved radioimmunoassay for vitamin D and its use in assessing vitamin D status. *Clin Chem* 1985;31:1815-1819.
12. Bischoff-Ferrari HA, Giovannucci E, Willett WC, Dietrich T, Dawson-Hughes B. Estimation of optimal serum concentrations of 25-hydroxyvitamin D for multiple health outcomes. *Am J Clin Nutr* 2006;84:18-28.
13. Holick MF. Vitamin D deficiency. *N Engl J Med* 2007;357:266-281.
14. Vieth R, Bischoff-Ferrari H, Boucher BJ, Dawson-Hughes B, Garland CF, Heaney RP, Holick MF, Hollis BW, Lamberg-Allardt C, McGrath JJ, et al. The urgent need to recommend an intake of vitamin D that is effective. *Am J Clin Nutr* 2007;85:649-650.
15. Luczynska CM, Arruda LK, Platts-Mills TA, Miller JD, Lopez M, Chapman MD. A two-site monoclonal antibody ELISA for the quantification of the major Dermatophagoides spp. allergens, Der p I and Der f I. *J Immunol Methods* 1989;118:227-235.
16. Kuczmarski RJ, Ogden CL, Grummer-Strawn LM, Flegal KM, Guo SS, Wei R, Mei Z, Curtin LR, Roche AF, Johnson CL. CDC growth charts: United States. *Adv Data* 2000:1-27.
17. Gardner W, Mulvey EP, Shaw EC. Regression Analyses of Counts and Rates: Poisson, Overdispersed Poisson, and Negative Binomial Models. *PSYCHOLOGICAL BULLETIN* 1995;118:392-392.
18. Basagana X, Sunyer J, Kogevinas M, Zock JP, Duran-Tauleria E, Jarvis D, Burney P, Anto JM. Socioeconomic Status and Asthma Prevalence in Young Adults The

European Community Respiratory Health Survey. *American Journal of Epidemiology* 2004;160:178-188.

19. Camargo Jr CA, Weiss ST, Zhang S, Willett WC, Speizer FE. Prospective Study of Body Mass Index, Weight Change, and Risk of Adult-onset Asthma in Women. *Archives of Internal Medicine* 1999;159:2582.

20. Hyppönen E, Läärä E, Reunanen A, Järvelin MR, Virtanen SM. Intake of vitamin D and risk of type 1 diabetes: a birth-cohort study. *The Lancet* 2001;358:1500-1503.

21. Parikh SJ, Edelman M, Uwaifo GI, Freedman RJ, Semega-Janneh M, Reynolds J, Yanovski JA. The Relationship between Obesity and Serum 1, 25-Dihydroxy Vitamin D Concentrations in Healthy Adults. *Endocrine Soc*; 2004. p. 1196-1199.

Table E1. Vitamin D levels and Continuous Measures of Allergy, Asthma Morbidity, and Asthma Severity in Costa Rican Children

| Outcomes                                              | Beta coefficient (95% CI) (P value) |                                   |                                |
|-------------------------------------------------------|-------------------------------------|-----------------------------------|--------------------------------|
|                                                       | Unadjusted                          | Adjusted <sup>1</sup>             |                                |
|                                                       |                                     | Model 1                           | Model 2                        |
| Total IgE (IU/ml) <sup>2</sup>                        | <b>-.43 (-.82 – -.04) (.03)</b>     | <b>-.47 (-.86 – -.08) (.02)</b>   | <b>-.44(-.86 – -.03) (.04)</b> |
| Dust Mite specific IgE                                | <b>-1.20 (-2.11– -.29) (.01)</b>    | <b>-1.11 (-2.04 – -.18) (.02)</b> | - .95 (-1.95 – .03) (.06)      |
| Size of skin test reaction to dust mite               | <b>-.17 (-.32 – -.04) (.01)</b>     | <b>-.16 (-.30 – -.02) (.03)</b>   | - .10 (-.27 – .05) (.18)       |
| Eosinophil count (cells/m <sup>3</sup> ) <sup>3</sup> | <b>-.23 (-.44– -.02) (.03)</b>      | <b>-.28 (-.49 – -.07) (.009)</b>  | - .22 (-.46 – .008) (.06)      |
| Baseline FEV <sub>1</sub>                             | <b>-.34 (-.63 – -.05) (.02)</b>     | - .08 (-.28 – .13) (.47)          | .02 (-.23 – .26) (.89)         |
| Dose–response slope to methacholine (μmol)            | - .26 (-.61 – .07) (.12)            | - .32 (-.67 – .02) (.064)         | - .27 (-.61 – .08) (.13)       |
| Absolute response to bronchodilator (ml)              | <b>-107 (-190 – -23) (.01)</b>      | <b>-109 (-191 – -27) (.009)</b>   | <b>-103 (-197 – -8) (.03)</b>  |

---

<sup>1</sup> Models 1 and 2 were adjusted for age, sex, BMI z-score, and parental education for all outcomes. All models for anti-inflammatory medication use, bronchodilator responsiveness and airway hyperreactivity were additionally adjusted for pre-bronchodilator FEV<sub>1</sub>. For model 2, the dose-response slope to methacholine was additionally adjusted for use of anti-inflammatory medications. The remaining variables were adjusted for both anti-inflammatory medication use and airway hyperreactivity.

<sup>2</sup> Outcome was transformed to a log<sub>10</sub> scale.

<sup>3</sup> Outcome was transformed to a log<sub>10</sub> scale. Model also adjusted for paternal history of hay fever and eczema.

Table E2. Vitamin D Levels and Categorical Measures of Allergy, Asthma Morbidity, and Asthma Severity in Costa Rican Children

| Outcomes                                          | Odds ratio (95% CI) (P value) |                               |                                |
|---------------------------------------------------|-------------------------------|-------------------------------|--------------------------------|
|                                                   | Unadjusted                    | Adjusted <sup>1</sup>         |                                |
|                                                   |                               | Model 1                       | Model 2                        |
| Total Eosinophil count > 500 cells/m <sup>3</sup> | .37 (.11– 1.21) (.10)         | <b>.26 (.07–.90) (.03)</b>    | .28 (.06–1.27) (.10)           |
| Total IgE > 100 IU/ml                             | <b>.20 (.05–.81) (.02)</b>    | <b>.17 (.04–.74) (.02)</b>    | <b>.08 (.01–.55) (.01)</b>     |
| Anti-inflammatory medications <sup>2</sup>        | .32 (.10 – 1.09) (.07)        | <b>.21 (.06 – .75) (.02)</b>  | .37 (.09 – 1.58) (.18)         |
| Inhaled steroid                                   | .20 (.06 – .68) (.01)         | <b>.14 (.04 – .50) (.004)</b> | <b>.21 (.05 – .91) (.04)</b>   |
| Airway response to ≤8.58 μmol of methacholine     | .17 (.03 – 1.06) (.06)        | <b>.16(.03 – 1.0) (.05)</b>   | <b>.17 (.02 – 1.0) (.05)</b>   |
| Hospitalizations for asthma in the previous year  | <b>.06 (.004 – .74) (.03)</b> | <b>.05 (.004 – .71) (.03)</b> | <b>.054 (.003 – .97) (.05)</b> |

|                    |                  |                          |                        |
|--------------------|------------------|--------------------------|------------------------|
| Emergency          | 1.87 (.10 – 36.9 | 1.95 (.09 – 40.20) (.67) | .65 (.02 – 25.7) (.82) |
| department or      | (.70)            |                          |                        |
| urgent care visits |                  |                          |                        |
| for asthma in the  |                  |                          |                        |
| previous year      |                  |                          |                        |

---

<sup>1</sup> Models 1 and 2 were adjusted for age, sex, BMI z-score, and parental education for all outcomes. Airway hyperresponsiveness was additionally adjusted for FEV<sub>1</sub> in all models. For model 2, airway hyperreactivity variables were additionally adjusted for use of anti-inflammatory medications. The anti-inflammatory medication use outcome was additionally adjusted for airway hyperreactivity. The remaining variables were adjusted for both anti-inflammatory medication use and airway hyperreactivity.

<sup>2</sup> Defined as use of inhaled corticosteroids or leukotriene inhibitors.
